# Supplementary material for: Growth of N-doped graphene from nitrogen containing aromatic compounds: the effect of precursors on the doped site
Source: Royal Society of Chemistry journal article supplement (doi:10.1039/c5ra22664c), 2016-01-01
Supplement: c5ra22664c1.pdf [file c5ra22664c1.pdf]

## Electronic Supplementary Information

# Growth of N-doped graphene from nitrogen containing aromatic compounds: The effect of precursors on the doped site

*Tokio Katoh,<sup>a</sup> Gaku Imamura,<sup>bc</sup> Seiji Obata,<sup>b</sup> and Koichiro Saiki<sup>\*ab</sup>*

*<sup>a</sup>Department of Chemistry, School of Science, The University of Tokyo, Kashiwanoha 5-1-5, Kashiwa, Chiba 277-8561, Japan*

*<sup>b</sup>Department of Complexity Science and Engineering, Graduate School of Frontier Sciences, The University of Tokyo, Kashiwanoha 5-1-5, Kashiwa, Chiba 277-8561, Japan, Tel: +81-4-7136-5526. Fax: +81-4-7136-3903. E-mail: saiki@k.u-tokyo.ac.jp*

*<sup>c</sup>World Premier International (WPI) Research Center, International Center for Materials Nanoarchitectonics (MANA), National Institute for Materials Science (NIMS), 1-1 Namiki, Tsukuba, Ibaraki 305-0044, Japan*

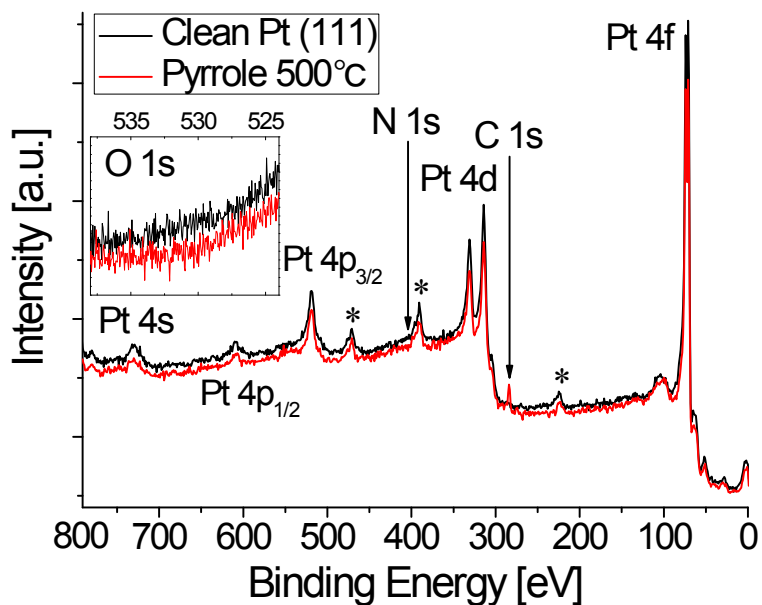

**Figure S1.** Wide range XPS spectra. Inset figure shows XPS O 1s region spectra. \*Peaks from Ta used as a substrate holder.

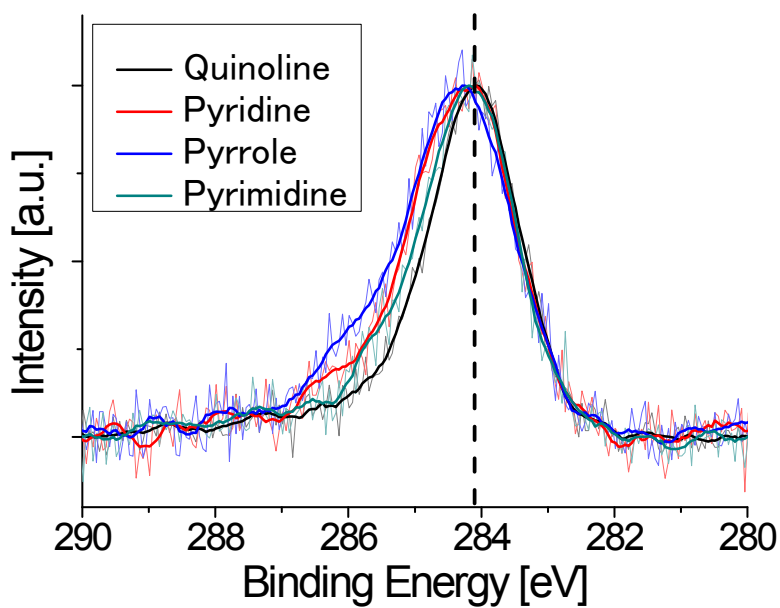

**Figure S2.** XPS C 1s region spectra of the graphenes synthesized at 500 °C. The dashed line at 284.1 eV is attributed to the  $sp^2$  carbon of graphene.

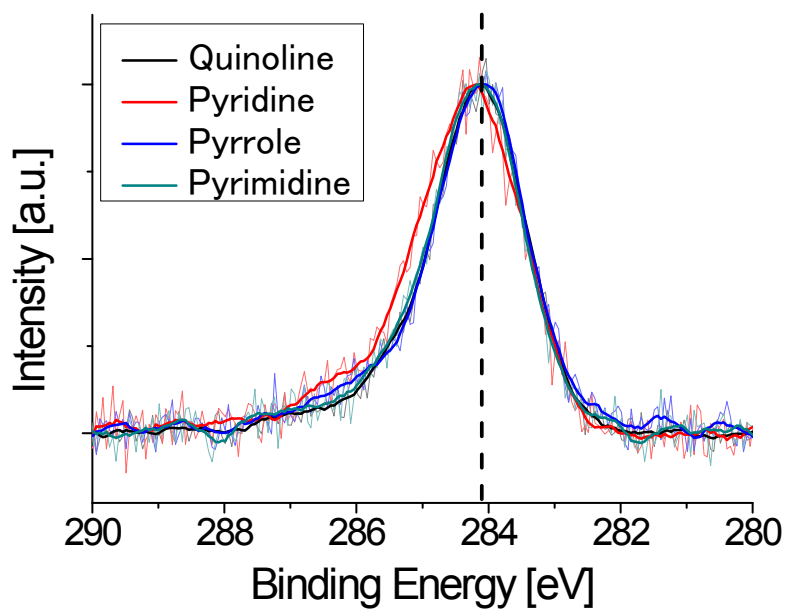

**Figure S3.** XPS C 1s region spectra of the graphenes synthesized at 600 °C. The dashed line at 284.1 eV is attributed to the  $sp^2$  carbon of graphene.

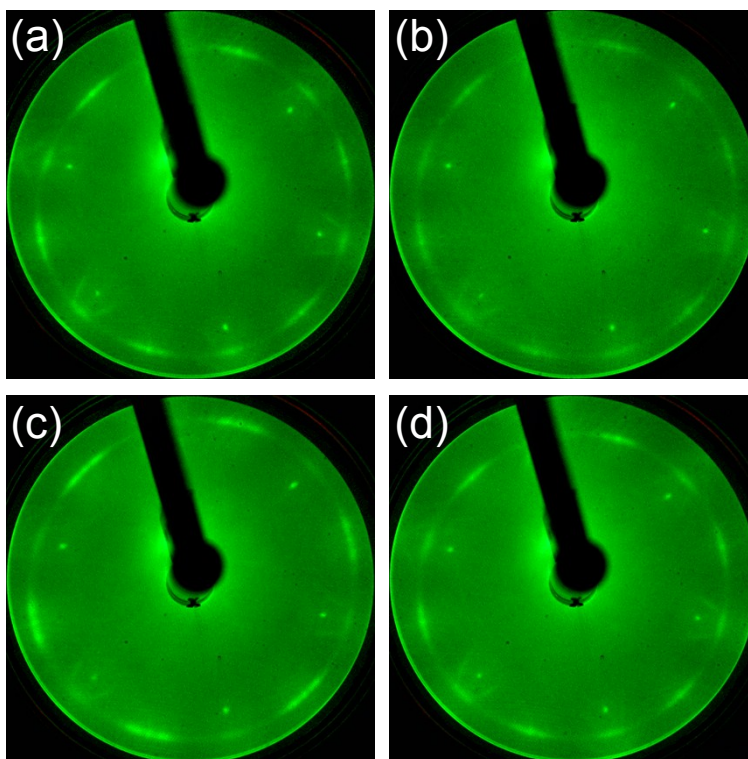

**Figure S4.** LEED patterns of the graphenes synthesized at 600 °C from (a) quinoline (b) pyridine (c) pyrrole (d) pyrimidine.

## DFT Calculation

DFT calculations were performed to optimize the structure of the source molecules with Gaussian 09 program package. We employed the restricted B3LYP with 6-31G(d,p) basis set. All the calculations were done with Fujitsu PRIMERGY CX250S1 in Research Center for Computational Science
